# Supplementary material for: Permanent magnetism in apoferritin-encapsulated Pd nanoparticles
Source: Royal Society of Chemistry journal article supplement (doi:10.1039/b614592b), 2006-11-24
Supplement: b614592b.pdf [file b614592b.pdf]

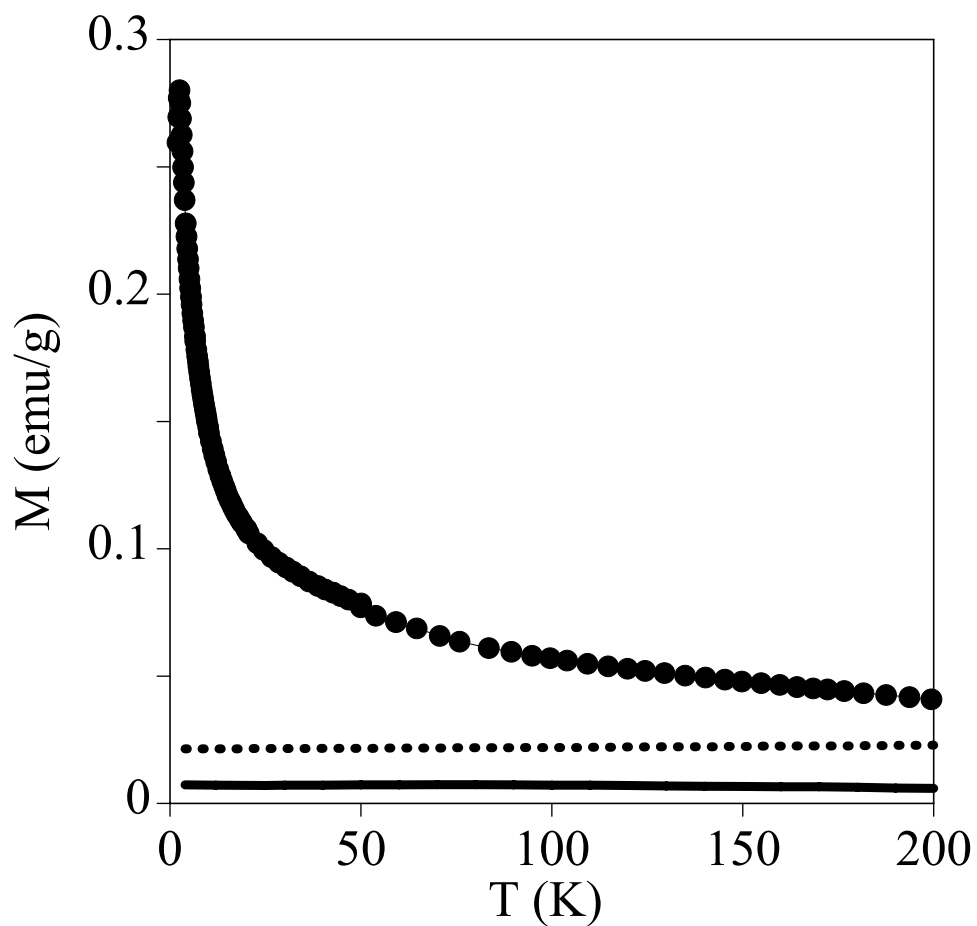

Fig. S1. Temperature dependence of the magnetization for apoferritin-encapsulated Pd nanoparticles (black circles), alkylammonium encapsulated Pd nanoparticles of similar size (dotted line) and bulk Pd (full line). The data for alkylammonium encapsulated Pd nanoparticles have been extracted from reference 7.
